# Supplementary material
Source: PubMed Central journal article supplement (PMC3779431)
Supplement: NIHMS510040-supplement-02.pdf [file NIHMS510040-supplement-02.pdf]

**Table S1 - Strain list****Strain list**

*MATa ade2-101 ura3-52 lys2-801 his3-Δ200 trp1-Δ63 leu2*

*MATalpha ade2-101 ura3-52 lys2-801 his3-Δ200 trp1-Δ63 leu2*

*tem1-3*

*ade2-101 ura3-52 lys2-801 his3-Δ200 trp1-Δ63 leu2*

*cdc15-1*

*ade2-101 ura3-52 lys2-801 his3-Δ200 trp1-Δ63 leu2*

*dbf2-2 dbf20::HYG*

*ade2-101 ura3-52 lys2-801 his3-Δ200 trp1-Δ63 leu2*

*nud1-44*

*ade2-101 ura3-52 lys2-801 his3-Δ200 trp1-Δ63 leu2*

*kar9::kanMx4*

*ade2-101 ura3-52 lys2-801 his3-Δ200 trp1-Δ63 leu2*

*dhc1::HIS3*

*ade2-101 ura3-52 lys2-801 his3-Δ200 trp1-Δ63 leu2*

*tem1-3 kar9::kanMx4*

*ade2-101 ura3-52 lys2-801 his3-Δ200 trp1-Δ63 leu2*

*tem1-3 dhc1::HIS3*

*ade2-101 ura3-52 lys2-801 his3-Δ200 trp1-Δ63 leu2*

*cdc15-1 kar9::kanMx4*

*ade2-101 ura3-52 lys2-801 his3-Δ200 trp1-Δ63 leu2*

*cdc15-1 dhc1::HIS3*

*ade2-101 ura3-52 lys2-801 his3-Δ200 trp1-Δ63 leu2*

*dbf2-2 dbf20::HYG kar9::kanMx4*

*ade2-101 ura3-52 lys2-801 his3-Δ200 trp1-Δ63 leu2*

*dbf2-2 dbf20::HYG dhc1::HIS3*

*ade2-101 ura3-52 lys2-801 his3-Δ200 trp1-Δ63 leu2*

*nud1-44 kar9::kanMx4*

*ade2-101 ura3-52 lys2-801 his3-Δ200 trp1-Δ63 leu2*

*nud1-44 dhc1::HIS3*

*ade2-101 ura3-52 lys2-801 his3-Δ200 trp1-Δ63 leu2*

*kar9::kanMx4 ura3::CFP-TUB1:URA3*

*ade2-101 lys2-801 his3-Δ200 trp1-Δ63 leu2*

*dhc1::HIS3 ura3::CFP-TUB1:URA3*  
*ade2-101 lys2-801 his3-Δ200 trp1-Δ63 leu2*

*kar9::KAR9-YFP:natNT2 ura3::CFP-TUB1:URA3*  
*ade2-101 lys2-801 his3-Δ200 trp1-Δ63 leu2*

*kar9::KAR9-S197A S496A-YFP:TRP1 ura3::CFP-TUB1:URA3*  
*ade2-101 lys2-801 his3-Δ200 trp1-Δ63 leu2*

*tem1-3 kar9::KAR9-YFP:natNT2 ura3::CFP-TUB1:URA3*  
*ade2-101 lys2-801 his3-Δ200 trp1-Δ63 leu2*

*cdc15-1 kar9::KAR9-YFP:natNT2 ura3::CFP-TUB1:URA3*  
*ade2-101 lys2-801 his3-Δ200 trp1-Δ63 leu2*

*dbf2-2 dbf20::kanMx4 kar9::KAR9-YFP:natNT2 ura3::CFP-TUB1:URA3*  
*ade2-101 lys2-801 his3-Δ200 trp1-Δ63 leu2*

*nud1-44 kar9::KAR9-YFP:natNT2 ura3::CFP-TUB1:URA3*  
*ade2-101 lys2-801 his3-Δ200 trp1-Δ63 leu2*

*cdc14-1 kar9::KAR9-YFP:natNT2 ura3::CFP-TUB1:URA3*  
*ade2-101 lys2-801 his3-Δ200 trp1-Δ63 leu2*

*cdc14-3 kar9::KAR9-YFP:natNT2 ura3::CFP-TUB1:URA3*  
*ade2-101 lys2-801 his3-Δ200 trp1-Δ63 leu2*

*clb4::kanMx4 kar9::KAR9-YFP:natNT2 ura3::CFP-TUB1:URA3*  
*ade2-101 lys2-801 his3-Δ200 trp1-Δ63 leu2*

*lte1::kanMx4 kar9::KAR9-YFP:natNT2 ura3::CFP-TUB1:URA3*  
*ade2-101 lys2-801 his3-Δ200 trp1-Δ63 leu2*

*kin4::kanMx4 kar9::KAR9-YFP:natNT2 ura3::CFP-TUB1:URA3*  
*ade2-101 lys2-801 his3-Δ200 trp1-Δ63 leu2*

*tem1-3 clb4::kanMx4 kar9::KAR9-YFP:natNT2 ura3::CFP-TUB1:URA3*  
*ade2-101 lys2-801 his3-Δ200 trp1-Δ63 leu2*

*nud1-44 clb4::kanMx4 kar9::KAR9-YFP:natNT2 ura3::CFP-TUB1:URA3*  
*ade2-101 lys2-801 his3-Δ200 trp1-Δ63 leu2*

*kar9::KAR9-YFP:TRP1 ura3::CFP-TUB1:URA3*  
*ade2-101 lys2-801 his3-Δ200 trp1-Δ63 leu2*

*kar9::KAR9-4R-YFP:TRP1 ura3::CFP-TUB1:URA3*  
*ade2-101 lys2-801 his3-Δ200 trp1-Δ63 leu2*

*tem1-3 kar9::KAR9-4R-YFP:TRP1 ura3::CFP-TUB1:URA3*  
*ade2-101 lys2-801 his3-Δ200 trp1-Δ63 leu2*

*nud1-44 kar9::KAR9-4R-YFP:TRP1 ura3::CFP-TUB1:URA3*  
*ade2-101 lys2-801 his3-Δ200 trp1-Δ63 leu2*

*siz1::LEU2 siz2::TRP1 kar9::KAR9-YFP:natNT2 ura3::CFP-TUB1:URA3  
ade2-101 lys2-801 his3-Δ200 trp1-Δ63 leu2*

*tem1-3 siz1::LEU2 siz2::TRP1 kar9::KAR9-YFP:natNT2 ura3::CFP-TUB1:URA3  
ade2-101 lys2-801 his3-Δ200 trp1-Δ63 leu2*

*nud1-44 siz1::LEU2 siz2::TRP1 kar9::KAR9-YFP:natNT2 ura3::CFP-TUB1:URA3  
ade2-101 lys2-801 his3-Δ200 trp1-Δ63 leu2*

*mad2::hphNT1 kar9::KAR9-YFP:natNT2 ura3::CFP-TUB1:URA3  
ade2-101 lys2-801 his3-Δ200 trp1-Δ63 leu2*

*nnf1-17 kar9::KAR9-YFP:natNT2 ura3::CFP-TUB1:URA3  
ade2-101 lys2-801 his3-Δ200 trp1-Δ63 leu2*

*mad2::hphNT1 nnf1-17 kar9::KAR9-YFP:natNT2 ura3::CFP-TUB1:URA3  
ade2-101 lys2-801 his3-Δ200 trp1-Δ63 leu2*

*mad2::hphNT1 tem1-3 kar9::KAR9-YFP:natNT2 ura3::CFP-TUB1:URA3  
ade2-101 lys2-801 his3-Δ200 trp1-Δ63 leu2*

*mad2::hphNT1 cdc15-1 kar9::KAR9-YFP:natNT2 ura3::CFP-TUB1:URA3  
ade2-101 lys2-801 his3-Δ200 trp1-Δ63 leu2*

*mad2::hphNT1 dbf2-2 dbf20::kanMx4 kar9::KAR9-YFP:natNT2 ura3::CFP-TUB1:URA3  
ade2-101 lys2-801 his3-Δ200 trp1-Δ63 leu2*

*mad2::hphNT1 nud1-44 kar9::KAR9-YFP:natNT2 ura3::CFP-TUB1:URA3  
ade2-101 lys2-801 his3-Δ200 trp1-Δ63 leu2*

*kar9::KAR9-R194A-YFP:TRP1 ura3::CFP-TUB1:URA3  
ade2-101 lys2-801 his3-Δ200 trp1-Δ63 leu2*

*kar9::KAR9-R200A-YFP:TRP1 ura3::CFP-TUB1:URA3  
ade2-101 lys2-801 his3-Δ200 trp1-Δ63 leu2*

*kar9::KAR9-S332A S429A-YFP:TRP1 ura3::CFP-TUB1:URA3  
ade2-101 lys2-801 his3-Δ200 trp1-Δ63 leu2*

*kar9::KAR9-R194A S332A S429A-YFP:TRP1 ura3::CFP-TUB1:URA3  
ade2-101 lys2-801 his3-Δ200 trp1-Δ63 leu2*

*kar9::KAR9-S197A S332A S429A-YFP:TRP1 ura3::CFP-TUB1:URA3  
ade2-101 lys2-801 his3-Δ200 trp1-Δ63 leu2*

*kar9::KAR9-TAP:HIS3 ura3::CFP-TUB1:URA3  
ade2-101 lys2-801 his3-Δ200 trp1-Δ63 leu2*

*clb4::natNT2 kar9::KAR9-TAP:HIS3 ura3::CFP-TUB1:URA3  
ade2-101 lys2-801 his3-Δ200 trp1-Δ63 leu2*

*dbf2-2 dbf20::kanMx4 kar9::KAR9-TAP:HIS3 ura3::CFP-TUB1:URA3  
ade2-101 lys2-801 his3-Δ200 trp1-Δ63 leu2*

*clb4::natNT2 dbf2-2 dbf20::kanMx4 kar9::KAR9-TAP:HIS3 ura3::CFP-TUB1:URA3  
ade2-101 lys2-801 his3-Δ200 trp1-Δ63 leu2*

*kar9::KAR9-TAP:LEU2 ura3::CFP-TUB1:URA3  
ade2-101 lys2-801 his3-Δ200 trp1-Δ63 leu2*

*kar9::KAR9-S197A-TAP:LEU2 ura3::CFP-TUB1:URA3  
ade2-101 lys2-801 his3-Δ200 trp1-Δ63 leu2*

*kar9::KAR9-S332A S429A-TAP:LEU2 ura3::CFP-TUB1:URA3  
ade2-101 lys2-801 his3-Δ200 trp1-Δ63 leu2*

*kar9::KAR9-S197A S332A S429A-TAP:LEU2 ura3::CFP-TUB1:URA3  
ade2-101 lys2-801 his3-Δ200 trp1-Δ63 leu2*

*clb4::kanMx4 kar9::KAR9-R194A-YFP:TRP1 ura3::CFP-TUB1:URA3  
ade2-101 lys2-801 his3-Δ200 trp1-Δ63 leu2*

*dbf2::hphNT1 kar9::KAR9-R194A-YFP:TRP1 ura3::CFP-TUB1:URA3  
ade2-101 lys2-801 his3-Δ200 trp1-Δ63 leu2*

*dbf2::hphNT1 clb4::kanMx4 kar9::KAR9-R194A-YFP:TRP1 ura3::CFP-TUB1:URA3  
ade2-101 lys2-801 his3-Δ200 trp1-Δ63 leu2*

*clb4::kanMx4 kar9::KAR9-S332A S429A-YFP:TRP1 ura3::CFP-TUB1:URA3  
ade2-101 lys2-801 his3-Δ200 trp1-Δ63 leu2*

*dbf2::hphNT1 kar9::KAR9-S332A S429A-YFP:TRP1 ura3::CFP-TUB1:URA3  
ade2-101 lys2-801 his3-Δ200 trp1-Δ63 leu2*

*dbf2::hphNT1 clb4::kanMx4 kar9::KAR9-S332A S429A-YFP:TRP1 ura3::CFP-TUB1:URA3  
ade2-101 lys2-801 his3-Δ200 trp1-Δ63 leu2*

*clb4::kanMx4 kar9::KAR9-R200A-YFP:TRP1 ura3::CFP-TUB1:URA3  
ade2-101 lys2-801 his3-Δ200 trp1-Δ63 leu2*

*dbf2::hphNT1 kar9::KAR9-R200A-YFP:TRP1 ura3::CFP-TUB1:URA3  
ade2-101 lys2-801 his3-Δ200 trp1-Δ63 leu2*

*dbf2::hphNT1 clb4::kanMx4 kar9::KAR9-R200A-YFP:TRP1 ura3::CFP-TUB1:URA3  
ade2-101 lys2-801 his3-Δ200 trp1-Δ63 leu2*

*spc42::SPC42-LoxP-mCherry:kanMx4-LoxP-GFP:HIS3 leu2::gdp:Cre-EBD78:LEU2  
kar9::KAR9-YFP:natNT2 ura3::CFP-TUB1:URA3  
ade2-101 lys2-801 his3-Δ200 trp1-Δ63 leu2*

*spc42::SPC42-LoxP-mCherry:kanMx4-LoxP-GFP:HIS3 leu2::gdp:Cre-EBD78:LEU2  
kar9::kanMx4 ura3::CFP-TUB1:URA3  
ade2-101 lys2-801 his3-Δ200 trp1-Δ63 leu2*

*spc42::SPC42-LoxP-mCherry:kanMx4-LoxP-GFP:HIS3 leu2::gdp:Cre-EBD78:LEU2  
dhc1::HIS3 ura3::CFP-TUB1:URA3  
ade2-101 lys2-801 his3-Δ200 trp1-Δ63 leu2*

*spc42::SPC42-LoxP-mCherry:kanMx4-LoxP-GFP:HIS3 leu2::gdp:Cre-EBD78:LEU2  
bub2::KAN kar9::KAR9-YFP:natNT2 ura3::CFP-TUB1:URA3  
ade2-101 lys2-801 his3-Δ200 trp1-Δ63 leu2*

*spc42::SPC42-LoxP-mCherry:kanMx4-LoxP-GFP:HIS3 leu2::gdp:Cre-EBD78:LEU2  
bfa1::KAN kar9::KAR9-YFP:natNT2 ura3::CFP-TUB1:URA3  
ade2-101 lys2-801 his3-Δ200 trp1-Δ63 leu2*

*spc42::SPC42-LoxP-mCherry:kanMx4-LoxP-GFP:HIS3 leu2::gdp:Cre-EBD78:LEU2  
tem1-3 kar9::KAR9-YFP:natNT2 ura3::CFP-TUB1:URA3  
ade2-101 lys2-801 his3-Δ200 trp1-Δ63 leu2*

*spc42::SPC42-LoxP-mCherry:kanMx4-LoxP-GFP:HIS3 leu2::gdp:Cre-EBD78:LEU2  
cdc15-1 kar9::KAR9-YFP:natNT2 ura3::CFP-TUB1:URA3  
ade2-101 lys2-801 his3-Δ200 trp1-Δ63 leu2*

*spc42::SPC42-LoxP-mCherry:kanMx4-LoxP-GFP:HIS3 leu2::gdp:Cre-EBD78:LEU2  
dbf2-2 dbf20::kanMx4 kar9::KAR9-YFP:natNT2 ura3::CFP-TUB1:URA3  
ade2-101 lys2-801 his3-Δ200 trp1-Δ63 leu2*

*spc42::SPC42-LoxP-mCherry:kanMx4-LoxP-GFP:HIS3 leu2::gdp:Cre-EBD78:LEU2  
nud1-44 kar9::KAR9-YFP:natNT2 ura3::CFP-TUB1:URA3  
ade2-101 lys2-801 his3-Δ200 trp1-Δ63 leu2*

*spc42::SPC42-LoxP-mCherry:kanMx4-LoxP-GFP:HIS3 leu2::gdp:Cre-EBD78:LEU2  
cdc14-1 kar9::KAR9-YFP:natNT2 ura3::CFP-TUB1:URA3  
ade2-101 lys2-801 his3-Δ200 trp1-Δ63 leu2*

*spc42::SPC42-LoxP-mCherry:kanMx4-LoxP-GFP:HIS3 leu2::gdp:Cre-EBD78:LEU2  
kar9::KAR9-4R-YFP:TRP1 ura3::CFP-TUB1:URA3  
ade2-101 lys2-801 his3-Δ200 trp1-Δ63 leu2*

*spc42::SPC42-LoxP-mCherry:kanMx4-LoxP-GFP:HIS3 leu2::gdp:Cre-EBD78:LEU2  
tem1-3 kar9::KAR9-4R-YFP:TRP1 ura3::CFP-TUB1:URA3  
ade2-101 lys2-801 his3-Δ200 trp1-Δ63 leu2*

*spc42::SPC42-LoxP-mCherry:kanMx4-LoxP-GFP:HIS3 leu2::gdp:Cre-EBD78:LEU2  
nud1-44 kar9::KAR9-4R-YFP:TRP1 ura3::CFP-TUB1:URA3  
ade2-101 lys2-801 his3-Δ200 trp1-Δ63 leu2*

*spc42::SPC42-LoxP-mCherry:kanMx4-LoxP-GFP:HIS3 leu2::gdp:Cre-EBD78:LEU2  
clb4::kanMx4 kar9::KAR9-YFP:natNT2 ura3::CFP-TUB1:URA3  
ade2-101 lys2-801 his3-Δ200 trp1-Δ63 leu2*

*spc42::SPC42-LoxP-mCherry:kanMx4-LoxP-GFP:HIS3 leu2::gdp:Cre-EBD78:LEU2  
tem1-3 clb4::kanMx4 kar9::KAR9-YFP:natNT2 ura3::CFP-TUB1:URA3  
ade2-101 lys2-801 his3-Δ200 trp1-Δ63 leu2*

*spc42::SPC42-LoxP-mCherry:kanMx4-LoxP-GFP:HIS3 leu2::gdp:Cre-EBD78:LEU2  
nud1-44 clb4::kanMx4 kar9::KAR9-YFP:natNT2 ura3::CFP-TUB1:URA3  
ade2-101 lys2-801 his3-Δ200 trp1-Δ63 leu2*

*spc42::SPC42-LoxP-mCherry:kanMx4-LoxP-GFP:HIS3 leu2::gdp:Cre-EBD78:LEU2*  
*kar9::KAR9-YFP:TRP1 ura3::CFP-TUB1:URA3*  
*ade2-101 lys2-801 his3-Δ200 trp1-Δ63 leu2*

*spc42::SPC42-LoxP-mCherry:kanMx4-LoxP-GFP:HIS3 leu2::gdp:Cre-EBD78:LEU2*  
*kar9::KAR9-R194A-YFP:TRP1 ura3::CFP-TUB1:URA3*  
*ade2-101 lys2-801 his3-Δ200 trp1-Δ63 leu2*

*spc42::SPC42-LoxP-mCherry:kanMx4-LoxP-GFP:HIS3 leu2::gdp:Cre-EBD78:LEU2*  
*kar9::KAR9-R200A-YFP:TRP1 ura3::CFP-TUB1:URA3*  
*ade2-101 lys2-801 his3-Δ200 trp1-Δ63 leu2*

*spc42::SPC42-LoxP-mCherry:kanMx4-LoxP-GFP:HIS3 leu2::gdp:Cre-EBD78:LEU2*  
*kar9::KAR9-S332A S429A-YFP:TRP1 ura3::CFP-TUB1:URA3*  
*ade2-101 lys2-801 his3-Δ200 trp1-Δ63 leu2*

*spc42::SPC42-LoxP-mCherry:kanMx4-LoxP-GFP:HIS3 leu2::gdp:Cre-EBD78:LEU2*  
*kar9::KAR9-R194A S332A S429A-YFP:TRP1 ura3::CFP-TUB1:URA3*  
*ade2-101 lys2-801 his3-Δ200 trp1-Δ63 leu2*

*spc42::SPC42-LoxP-mCherry:kanMx4-LoxP-GFP:HIS3 leu2::gdp:Cre-EBD78:LEU2*  
*kar9::KAR9-S197A S332A S429A-YFP:TRP1 ura3::CFP-TUB1:URA3*  
*ade2-101 lys2-801 his3-Δ200 trp1-Δ63 leu2*
